# Supplementary material for: Voltammetric Investigation of Ferulic Acid at Disposable Pencil Graphite Electrode
Source: MDPI journal article supplement (doi:10.3390/mi14101951), 2023-10-19
Supplement: s1 [file s1]

## Supplementary information

# Voltammetric Investigation of Ferulic Acid at Disposable Pencil Graphite Electrode

Iulia Gabriela David <sup>1,\*</sup>, Dana Elena Popa <sup>1,\*</sup>, Mihaela Buleandra <sup>1</sup>, Silvia Nicoleta Codreanu <sup>1</sup>, Lorelei Croitoru <sup>1</sup>, Laura Andreea Iordache <sup>1</sup> and Hassan Noor <sup>2,3</sup>

<sup>1</sup> Department of Analytical Chemistry and Physical Chemistry, Faculty of Chemistry, University of Bucharest, Panduri Av. 90-92, District 5, 050663 Bucharest, Romania; mihaela.buleandra@g.unibuc.ro (M.B.); codreanu.silvia233@gmail.com (S.N.C.); croitoru.lorelei@gmail.com (L.C.); lauraiordache24@gmail.com (L.A.I.)

<sup>2</sup> Department of Surgery, Faculty of Medicine, "Lucian Blaga" University Sibiu, Lucian Blaga Street 25, 550169 Sibiu, Romania; hassan.noor@ulbsibiu.ro

<sup>3</sup> European Hospital Medlife-Polisano, Strada Izvorului 1A, 550169 Sibiu, Romania

\* Correspondence: gabrielaiulia.david@g.unibuc.ro (I.G.D.); elena.popa@chimie.unibuc.ro (D.E.P.)

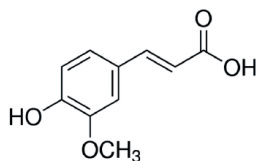

Figure S1. FA chemical structure

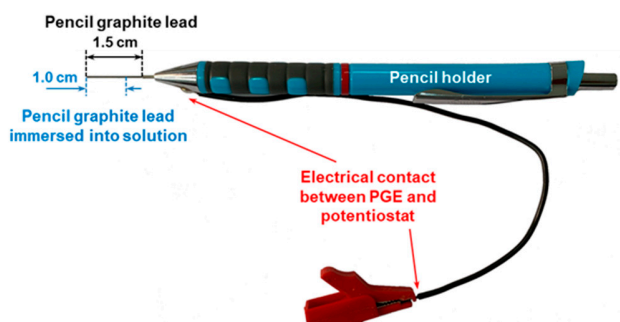

Figure S2. The PGE.

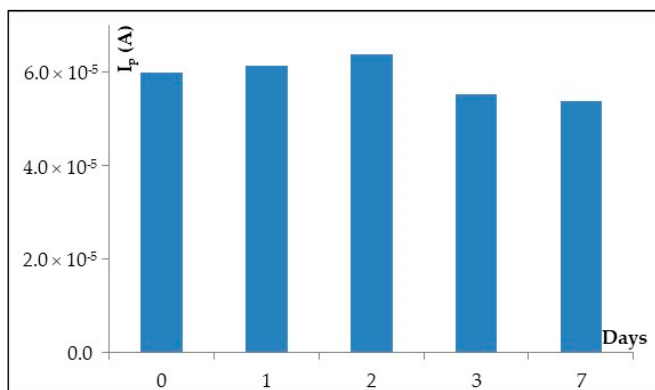

**Figure S3.** The variation of the DPV anodic peak current recorded at HB\_PGE for  $1.00 \times 10^{-3}$  mol/L FA in ABS pH 4.00 prepared at different days from the same ethanolic  $1.00 \times 10^{-2}$  mol/L FA stock solution.

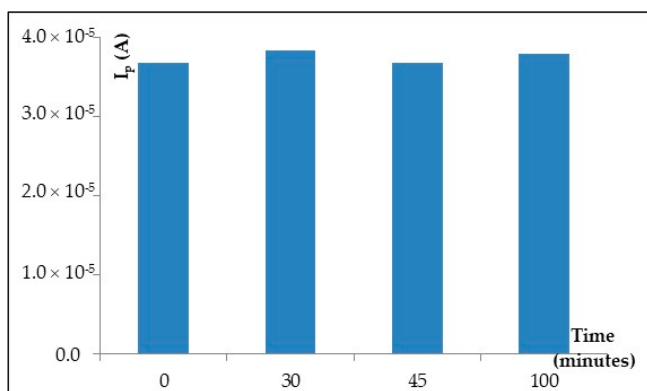

**Figure S4.** The variation of the DPV anodic peak current recorded at different time intervals at HB\_PGE for a  $5.00 \times 10^{-4}$  mol/L FA in ABS pH 4.00.

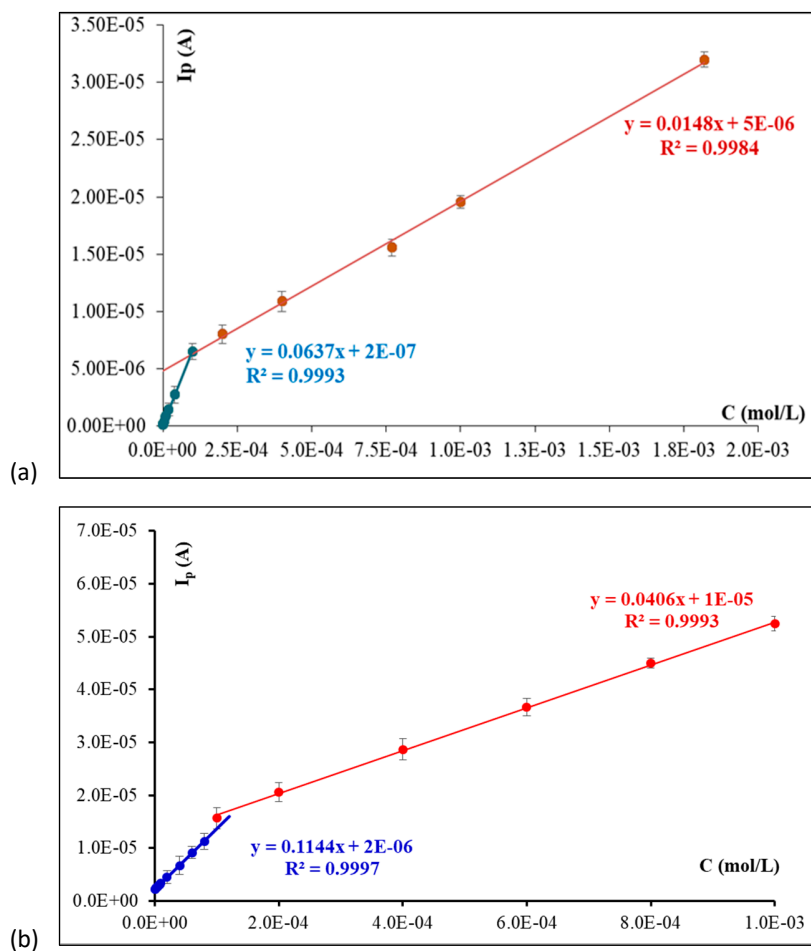

**Figure S5.** The  $I_p=f(C)$  dependencies obtained for the analysis of FA in BRB pH 4.56 solutions at HB\_PGE by (a) DPV and (b) SWV.

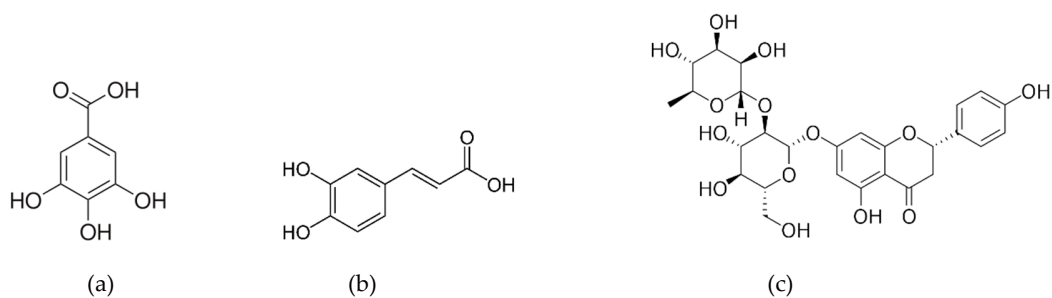

**Figure S6.** Chemical structures of the polyphenols tested as possible interferents in FA DPV analysis at HB\_PGE (a) gallic acid; (b) caffeic acid and (c) naringin.

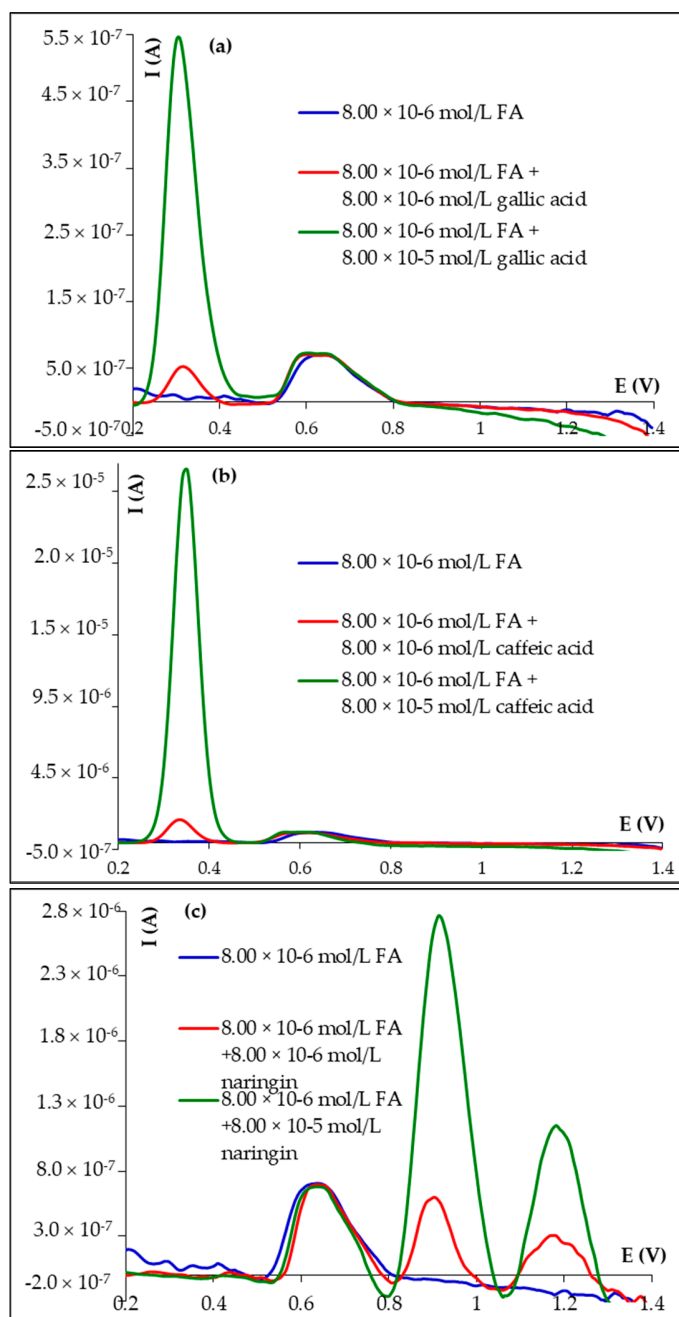

**Figure S7.** Differential pulse voltammograms recorded at HB\_PGE for  $8.00 \times 10^{-6}$  mol/L FA in BRB pH 4.56 solutions in the presence of (a) gallic acid; (b) caffeic acid and (c) naringin.
